# Supplementary material for: Seed sourcing strategies for ecological restoration under climate change: A review of the current literature
Source: Frontiers journal article supplement (doi:10.3389/fcosc.2022.938110), 2022-10-06
Supplement: Table_1.xlsx [file Table_1.xlsx]

## Sheet: RayyanInclude
Authors	Year Published	Title	Journal Detail
Aavik, T. and A. Helm	2018	Restoration of plant species and genetic diversity depends on landscape-scale dispersal.	Restoration Ecology 26: S92-S102.
Acosta, A. L., F. d'Albertas, M. D. Leite, A. M. Saraiva and J. P. W. Metzger	2018	Gaps and limitations in the use of restoration scenarios: a review.	Restoration Ecology 26(6): 1108-1119.
Ahrens, C. W., R. A. Mazanec, T. Paap, K. X. Ruthrof, A. Challis, G. Hardy, M. Byrne, D. T. Tissue and P. D. Rymer	2019	Adaptive variation for growth and resistance to a novel pathogen along climatic gradients in a foundation tree.	Evol Appl 12(6): 1178-1190.
Ahuja, M. R.	2011	Strategies for conservation of germplasm in endemic redwoods in the face of climate change: a review.	Plant Genetic Resources-Characterization and Utilization 9(3): 411-422.
Aitken, S. N. and J. B. Bemmels	2016	Time to get moving: assisted gene flow of forest trees.	Evol Appl 9(1): 271-290.
Aitken, S. N., M. C. Whitlock and D. J. Futuyma	2013	Assisted Gene Flow to Facilitate Local Adaptation to Climate Change.	Annual review of ecology, evolution, and systematics, 44, pp.367-388.
Alex and J. M. er	2010	Genetic differences in the elevational limits of native and introduced Lactuca serriola populations.	Journal of Biogeography 37(10): 1951-1961.
Al-Hawija, B. N., S. Lachmuth, E. Welk and I. Hensen	2015	Performance of seedlings from natural and afforested populations of Cupressus sempervirens under different temperature and moisture regimes.	Plant Species Biology 30(4): 257-271.
Ambrose, A. R., W. L. Baxter, C. S. Wong, R. R. Naesborg, C. B. Williams and T. E. Dawson	2015	Contrasting drought-response strategies in California redwoods.	Tree Physiol 35(5): 453-469.
Andalo, C., J. Beaulieu and J. Bousquet	2005	The impact of climate change on growth of local white spruce populations in Quebec, Canada.	Forest Ecology and Management 205(1-3): 169-182.
Andersson, B. and A. Fedorkov	2004	Longitudinal differences in Scots pine frost hardiness.	Silvae Genetica 53(2): 76-80.
Anekonda, T. S., L. D. Hansen, M. Bacca and R. S. Criddle	1996	Selection for biomass production based on respiration parameters in eucalypts: Effects of origin and growth climates on growth rates.	Canadian Journal of Forest Research-Revue Canadienne De Recherche Forestiere 26(9): 1556-1568.
Aparicio-Renteria, A., H. Viveros-Viveros, J. Hernandez-Villa, C. Saenz-Romero, C. Ruiz-Montiel and J. A. P. Posadas	2020	Altitudinal zoning of Pinus patula from cones and seeds in the sierra de Huayacocotla, Veracruz, Mexico.	Madera Y Bosques 26(2).
Apostol, E. N. and M. Budeanu	2019	Adaptability of Narrow-Crowned Norway Spruce Ideotype (Picea abies (L.) Karst. pendula Form) in 25 Years Half-Sib Comparative Trials in the Eastern Carpathians.	Forests 10(5).
Arab, L., S. Seegmueller, M. Dannenmann, M. Eiblmeier, G. Albasher, S. Alfarraj and H. Rennenberg	2020	Foliar traits of sessile oak (Quercus petraea Liebl) seedlings are largely determined by site properties rather than seed origin.	Tree Physiology 40(12): 1648-1667.
Auffret, A. G., Y. Rico, J. M. Bullock, D. A. P. Hooftman, R. J. Pakeman, M. B. Soons, A. Suarez-Esteban, A. Traveset, H. H. Wagner and S. A. O. Cousins	2017	Plant functional connectivity - integrating landscape structure and effective dispersal.	Journal of Ecology 105(6): 1648-1656.
Azpilicueta, M. M., L. A. Gallo, M. van Zonneveld, E. Thomas, C. Moreno and P. Marchelli	2013	Management of Nothofagus genetic resources: Definition of genetic zones based on a combination of nuclear and chloroplast marker data.	Forest Ecology and Management 302: 414-424.
Bansal, S., J. B. St Clair, C. A. Harrington and P. J. Gould	2015	Impact of climate change on cold hardiness of Douglas-fir (Pseudotsugamenziesii): environmental and genetic considerations.	Global Change Biology 21(10): 3814-3826.
Barga, S. C., P. Olwell, F. Edwards, L. Prescott and E. A. Leger	2020	Seeds of Success: A conservation and restoration investment in the future ofUSlands.	Conservation Science and Practice 2(7).
Bauk, K., J. Flores, C. Ferrero, R. Perez-Sanchez, M. L. L. Penas and D. E. Gurvich	2017	Germination characteristics of Gymnocalycium monvillei (Cactaceae) along its entire altitudinal range.	Botany 95(4): 419-428.
Bayala, J., Z. Sanon, P. Bazie, J. Sanou, O. Roupsard, C. Jourdan, A. Raebild, B. Kelly, J. B. L. Okullo, M. Thiam and J. Yidana	2018	Relationships between climate at origin and seedling traits in eight Panafrican provenances of Vitellaria paradoxa CF Gaertn. under imposed drought stress.	Agroforestry Systems 92(6): 1455-1467.
Beaulieu, J., M. Perron and J. Bousquet	2004	Multivariate patterns of adaptive genetic variation and seed source transfer in Picea mariana.	Canadian Journal of Forest Research 34(3): 531-545.
Beierkuhnlein, C., D. Thiel, A. Jentsch, E. Willner and J. Kreyling	2011	Ecotypes of European grass species respond differently to warming and extreme drought.	Journal of Ecology 99(3): 703-713.
Benito-Garzon, M. and J. Fernandez-Manjarres	2015	Testing scenarios for assisted migration of forest trees in Europe.	New Forests 46(5-6): 979-994.
Benito-Garzon, M., H. D. Minh, N. Frascaria-Lacoste and J. Fernandez-Manjarres	2013	Habitat Restoration and Climate Change: Dealing with Climate Variability, Incomplete Data, and Management Decisions with Tree Translocations.	Restoration Ecology 21(5): 530-536.
Benomar, L., M. S. Lamhamedi, A. Rainville, J. Beaulieu, J. Bousquet and H. A. Margolis	2016	Genetic Adaptation vs. Ecophysiological Plasticity of Photosynthetic-Related Traits in Young Picea glauca Trees along a Regional Climatic Gradient.	Front Plant Sci 7: 48.
Bessega, C., M. Cony, B. O. Saidman, R. Aguilo, P. Villagra, J. A. Alvarez, C. Pometti and J. C. Vilardi	2019	Genetic diversity and differentiation among provenances of Prosopis flexuosa DC (Leguminosae) in a progeny trial: Implications for arid land restoration.	Forest Ecology and Management 443: 59-68.
Bezzalla, A., S. Boudjabi and H. Chenchouni	2018	Seedlings of Argan (Argania spinosa) from different geographical provenances reveal variable morphological growth responses to progressive drought stress under nursery conditions.	Agroforestry Systems 92(5): 1201-1211.
Bjorkman, A. D., M. Vellend, E. R. Frei and G. H. R. Henry	2017	Climate adaptation is not enough: warming does not facilitate success of southern tundra plant populations in the high Arctic.	Global Change Biology 23(4): 1540-1551.
Blossey, B., V. Nuzzo and A. Davalos	2017	Climate and rapid local adaptation as drivers of germination and seed bank dynamics of Alliaria petiolata (garlic mustard) in North America.	Journal of Ecology 105(6): 1485-1495.
Blumenthal, D. M., D. R. LeCain, L. M. Porensky, E. A. Leger, R. Gaffney, T. W. Ocheltree and A. M. Pilmanis	2021	Local adaptation to precipitation in the perennial grassElymus elymoides: Trade-offs between growth and drought resistance traits.	Evolutionary Applications 14(2): 524-535.
Boisvert-Marsh, L., S. Royer-Tardif, P. Nolet, F. Doyon and I. Aubin	2020	Using a Trait-Based Approach to Compare Tree Species Sensitivity to Climate Change Stressors in Eastern Canada and Inform Adaptation Practices.	Forests 11(9).
Bontrager, M. and A. L. Angert	2019	Gene flow improves fitness at a range edge under climate change.	Evolution Letters 3(1): 55-68.
Booth, T. H.	2016	Identifying particular areas for potential seed collections for restoration plantings under climate change.	Ecological Management & Restoration 17(3): 228-234.
Borgman, E. M., A. W. Schoettle and A. L. Angert	2015	Assessing the potential for maladaptation during active management of limber pine populations: a common garden study detects genetic differentiation in response to soil moisture in the Southern Rocky Mountains.	Canadian Journal of Forest Research 45(4): 496-505.
Boshier, D. and J. Stewart	2005	How local is local? Identifying the scale of adaptive variation in ash (Fraxinus excelsior L.): results from the nursery.	Forestry 78(2): 135-143.
Bower, A. D. and S. N. Aitken	2008	Ecological genetics and seed transfer guidelines for Pinus albicaulis (Pinaceae).	Am J Bot 95(1): 66-76.
Bower, A. D., J. B. St Clair and V. Erickson	2014	Generalized provisional seed zones for native plants.	Ecol Appl 24(5): 913-919.
Brabec, M. M., M. J. Germino, D. J. Shinneman, D. S. Pilliod, S. K. McIlroy and R. S. Arkle	2015	Challenges of Establishing Big Sagebrush (Artemisia tridentata) in Rangeland Restoration: Effects of Herbicide, Mowing, Whole-Community Seeding, and Sagebrush Seed Sources.	Rangeland Ecology & Management 68(5): 432-435.
Braidwood, D. W., M. A. Taggart, M. Smith and R. Andersen	2018	Translocations, conservation, and climate change: use of restoration sites as protorefuges and protorefugia.	Restoration Ecology 26(1): 20-28.
Brawner, J. T., G. R. Hodge, R. Meder and W. S. Dvorak	2014	Visualising the environmental preferences of Pinus tecunumanii populations.	Tree Genetics & Genomes 10(5): 1123-1133.
Breed, M. F., N. J. C. Gellie and A. J. Lowe	2016	Height differences in two eucalypt provenances with contrasting levels of aridity.	Restoration Ecology 24(4): 471-478.
Breed, M. F., P. A. Harrison, A. Bischoff, P. Durruty, N. J. C. Gellie, E. K. Gonzales, K. Havens, M. Karmann, F. F. Kilkenny, S. L. Krauss, A. J. Lowe, P. Marques, P. G. Nevill, P. L. Vitt and A. Bucharova	2018	Priority Actions to Improve Provenance Decision-Making.	Bioscience 68(7): 510-516.
Breed, M. F., K. M. Ottewell, M. G. Gardner and A. J. Lowe	2011	Clarifying climate change adaptation responses for scattered trees in modified landscapes.	Journal of Applied Ecology 48(3): 637-641.
Breed, M. F., M. G. Stead, K. M. Ottewell, M. G. Gardner and A. J. Lowe	2013	Which provenance and where? Seed sourcing strategies for revegetation in a changing environment.	Conservation Genetics 14(1): 1-10.
Brendel, M. R., F. M. Schurr and C. S. Sheppard	2021	Inter- and intraspecific selection in alien plants: How population growth, functional traits and climate responses change with residence time.	Global Ecology and Biogeography 30(2): 429-442.
Broadhurst, L., C. Waters and D. Coates	2017	Native seed for restoration: a discussion of key issues using examples from the flora of southern Australia.	Rangeland Journal 39(5-6): 487-498.
Bucharova, A., O. Bossdorf, N. Holzel, J. Kollmann, R. Prasse and W. Durka	2019	Mix and match: regional admixture provenancing strikes a balance among different seed-sourcing strategies for ecological restoration.	Conservation Genetics 20(1): 7-17.
Bucharova, A., S. Michalski, J. M. Hermann, K. Heveling, W. Durka, N. Holzel, J. Kollmann and O. Bossdorf	2017	Genetic differentiation and regional adaptation among seed origins used for grassland restoration: lessons from a multispecies transplant experiment.	Journal of Applied Ecology 54(1): 127-136.
Bullock, J. M., S. M. White, C. Prudhomme, C. Tansey, R. Perea and D. A. P. Hooftman	2012	Modelling spread of British wind-dispersed plants under future wind speeds in a changing climate.	Journal of Ecology 100(1): 104-115.
Butnor, J. R., B. M. Verrico, K. H. Johnsen, C. A. Maier, V. Vankus and S. R. Keller	2019	Phenotypic Variation in Climate-Associated Traits of Red Spruce (Picea rubens Sarg.) along Elevation Gradients in the Southern Appalachian Mountains.	Castanea 84(2): 128-143.
Butterfield, B. J., S. M. Copeland, S. M. Munson, C. M. Roybal and T. E. Wood	2017	Prestoration: using species in restoration that will persist now and into the future.	Restoration Ecology 25: S155-S163.
Carter, D. L. and J. M. Blair	2012	Seed source affects establishment and survival for three grassland species sown into reciprocal common gardens.	Ecosphere 3(11).
Carter, K. K.	1996	Provenance tests as indicators of growth response to climate change in 10 north temperate tree species.	Canadian Journal of Forest Research-Revue Canadienne De Recherche Forestiere 26(6): 1089-1095.
Castanha, C., M. S. Torn, M. J. Germino, B. Weibel and L. M. Kueppers	2013	Conifer seedling recruitment across a gradient from forest to alpine tundra: effects of species, provenance, and site.	Plant Ecology & Diversity 6(3-4): 307-318.
Castellanos-Acuna, D., R. Lindig-Cisneros and C. Saenz-Romero	2015	Altitudinal assisted migration of Mexican pines as an adaptation to climate change.	Ecosphere 6(1).
Castellanos-Acuna, D., C. Saenz-Romero, R. A. Lindig-Cisneros, N. M. Sanchez-Vargas, P. Lobbit and J. C. Montero-Castro	2013	ALTITUDINAL VARIATION AMONG SPECIES AND PROVENANCE OF Pinus pseudostrobus, P. devoniana and P. leiophylla. NURSERY TEST.	Revista Chapingo Serie Ciencias Forestales Y Del Ambiente 19(3): 399-411.
Castellanos-Acuna, D., K. W. Vance-Borland, J. B. St Clair, A. Hamann, J. Lopez-Upton, E. Gomez-Pineda, J. M. Ortega-Rodriguez and C. Saenz-Romero	2018	Climate-based seed zones for Mexico: guiding reforestation under observed and projected climate change.	New Forests 49(3): 297-309.
Chakraborty, A., P. K. Joshi and K. Sachdeva	2016	Predicting distribution of major forest tree species to potential impacts of climate change in the central Himalayan region.	Ecological Engineering 97: 593-609.
Chakraborty, D., C. Matulla, K. Andre, L. Weissenbacher and S. Schueler	2019	Survival of Douglas-fir provenances in Austria: site-specific late and early frost events are more important than provenance origin.	Annals of Forest Science 76(4).
Chakraborty, D., T. L. Wang, K. Andre, M. Konnert, M. J. Lexer, C. Matulla and S. Schueler	2015	Selecting Populations for Non-Analogous Climate Conditions Using Universal Response Functions: The Case of Douglas-Fir in Central Europe.	Plos One 10(8).
Chen, B. M., Y. Gao, H. X. Liao and S. L. Peng	2017	Differential responses of invasive and native plants to warming with simulated changes in diurnal temperature ranges.	AoB Plants 9(4): plx028.
Christmas, M. J., M. F. Breed and A. J. Lowe	2016	Constraints to and conservation implications for climate change adaptation in plants.	Conservation Genetics 17(2): 305-320.
Chung, M. Y., S. Son, S. Herrando-Moraira, C. Q. Tang, M. Maki, Y. D. Kim, J. Lopez-Pujol, J. L. Hamrick and M. G. Chung	2020	Incorporating differences between genetic diversity of trees and herbaceous plants in conservation strategies.	Conservation Biology 34(5): 1142-1151.
Cochrane, A.	2019	Effects of temperature on germination in eight Western Australian herbaceous species.	Folia Geobotanica 54(1-2): 29-42.
Cochrane, A., G. L. Hoyle, C. J. Yates, J. Wood and A. B. Nicotra	2014	Predicting the impact of increasing temperatures on seed germination among populations of Western Australian Banksia (Proteaceae).	Seed Science Research 24(3): 195-205.
Compagnoni, A. and P. B. Adler	2014	Warming, competition, and Bromus tectorum population growth across an elevation gradient.	Ecosphere 5(9).
Conlisk, E., C. Castanha, M. J. Germino, T. T. Veblen, J. M. Smith, A. B. Moyes and L. M. Kueppers	2018	Seed origin and warming constrain lodgepole pine recruitment, slowing the pace of population range shifts.	Glob Chang Biol 24(1): 197-211.
Cortan, D., M. Nonic, M. Sijacic-Nikolic, M. SijacicNikolic, J. Milovanovic and M. Nonic	2019 Phenotypic Plasticity of European Beech from International Provenance Trial in Serbia.
Crow, T. M., S. E. Albeke, C. A. Buerkle and K. M. Hufford	2018	Provisional methods to guide species-specific seed transfer in ecological restoration.	Ecosphere 9(1).
Cruzado-Vargas, A. L., A. Blanco-Garcia, R. Lindig-Cisneros, M. Gomez-Romero, L. Lopez-Toledo, E. de la Barrera and C. Saenz-Romero	2021	Reciprocal Common Garden Altitudinal Transplants Reveal Potential Negative Impacts of Climate Change on Abies religiosa Populations in the Monarch Butterfly Biosphere Reserve Overwintering Sites.	Forests 12(1).
Dalen, L. S. and O. Johnsen	2004	CO2 enrichment, nitrogen fertilization and development of freezing tolerance in Norway spruce.	Trees-Structure and Function 18(1): 10-18.
Davidson, B. E. and M. J. Germino	2020	Spatial grain of adaptation is much finer than ecoregional-scale common gardens reveal.	Ecology and Evolution 10(18): 9920-9931.
Davis, E. L., H. A. Hager and Z. Gedalof	2018	Soil properties as constraints to seedling regeneration beyond alpine treelines in the Canadian Rocky Mountains.	Arctic Antarctic and Alpine Research 50(1).
Daws, M. I., H. Cleland, P. Chmielarz, F. Gorian, O. Leprince, C. E. Mullins, C. A. Thanos, V. Vandvik and H. W. Pritchard	2006	Variable desiccation tolerance in Acer pseudoplatanus seeds in relation to developmental conditions: a case of phenotypic recalcitrance?	Funct Plant Biol 33(1): 59-66.
de Dato, G., A. Teani, C. Mattioni, M. Marchi, M. C. Monteverdi and F. Ducci	2018	Delineation of seed collection zones based on environmental and genetic characteristics for Quercus suber L. in Sardinia, Italy.	Iforest-Biogeosciences and Forestry 11: 651-659.
de Keyzer, C. W., N. E. Rafferty, D. W. Inouye and J. D. Thomson	2017	Confounding effects of spatial variation on shifts in phenology.	Glob Chang Biol 23(5): 1783-1791.
De Kort, H., J. Mergeay, K. er Mijnsbrugge, G. Decocq, S. Maccherini, H. H. K. Bruun, O. Honnay and K. epitte	2014	An evaluation of seed zone delineation using phenotypic and population genomic data on black alder Alnus glutinosa.	Journal of Applied Ecology 51(5): 1218-1227.
De Kort, H., B. Panis, K. Helsen, R. Douzet, S. B. Janssens and O. Honnay	2020	Pre-adaptation to climate change through topography-driven phenotypic plasticity.	Journal of Ecology 108(4): 1465-1474.
de la Mata, R. and R. Zas	2010	Performance of Maritime Pine Spanish Mediterranean Provenances at Young Ages in a Transitional Region Between Atlantic and Mediterranean Climates in NW Spain.	Silvae Genetica 59(1): 8-17.
de Oliveira, G. M., F. F. S. da Silva, M. D. Araujo, D. C. C. da Costa, S. E. V. Gomes, J. R. Matias, F. Angelotti, C. R. P. Cruz, C. E. Seal and B. F. Dantas	2019	Environmental stress, future climate, and germination of Myracrodruon urundeuva seeds.	Journal of Seed Science 41(1): 32-43.
Dickman, E. E., L. K. Pennington, S. J. Franks and J. P. Sexton	2019	Evidence for adaptive responses to historic drought across a native plant species range.	Evol Appl 12(8): 1569-1582.
Dillaway, D. N. and E. L. Kruger	2011	Leaf respiratory acclimation to climate: comparisons among boreal and temperate tree species along a latitudinal transect.	Tree Physiology 31(10): 1114-1127.
Ding, C., L. McAuley, M. J. Meitner and Y. A. El-Kassaby	2012	Evaluating Interior Spruce Seed Deployment with GIS-Based Modeling Using British Columbia's Prince George Seed Planning Zone as a Model.	Silvae Genetica 61(6): 271-279.
Dixit, A. and T. Kolb	2020	Variation in seedling budburst phenology and structural traits among southwestern ponderosa pine provenances.	Canadian Journal of Forest Research 50(9): 872-879.
Dixit, A., T. Kolb and O. Burney	2020	Provenance Geographical and Climatic Characteristics Influence Budburst Phenology of Southwestern Ponderosa Pine Seedlings.	Forests 11(10).
Driscoll, D. A., S. C. Banks, P. S. Barton, K. Ikin, P. Lentini, D. B. Lindenmayer, A. L. Smith, L. E. Berry, E. L. Burns, A. Edworthy, M. J. Evans, R. Gibson, R. Heinsohn, B. Howland, G. Kay, N. Munro, B. C. Scheele, I. Stirnemann, D. Stojanovic, N. Sweaney, N. R. Villasenor and M. J. Westgate	2014	The trajectory of dispersal research in conservation biology. Systematic review.	PLoS One 9(4): e95053.
Dullinger, S., T. Dirnbock and G. Grabherr	2004	Modelling climate change-driven treeline shifts: relative effects of temperature increase, dispersal and invasibility.	Journal of Ecology 92(2): 241-252.
Eckhart, T., S. Walcher, H. Hasenauer and M. van Loo	2017	Genetic diversity and adaptive traits of European versus American Douglas-fir seedlings.	European Journal of Forest Research 136(5-6): 811-825.
Eilmann, B., S. M. G. de Vries, J. den Ouden, G. M. J. Mohren, P. Sauren and U. Sass-Klaassen	2013	Origin matters! Difference in drought tolerance and productivity of coastal Douglas-fir (Pseudotsuga menziesii (Mirb.)) provenances.	Forest Ecology and Management 302: 133-143.
emir, G. E., Z. Kaya, F. Temel and S. Onde	2010	Genetic Variation in Cold Hardiness and Phenology Between and Within Turkish Red Pine (Pinus brutia Ten.) Populations: Implications for Seed Transfer.	Silvae Genetica 59(2): 49-57.
Engler, R., W. Hordijk and A. Guisan	2012	The MIGCLIM R package - seamless integration of dispersal constraints into projections of species distribution models.	Ecography 35(10): 872-878.
Erickson, V. J. and A. Halford	2020	Seed planning, sourcing, and procurement.	Restoration Ecology 28: S216-S224.
Espeland, E. K., N. C. Emery, K. L. Mercer, S. A. Woolbright, K. M. Kettenring, P. Gepts and J. R. Etterson	2017	Evolution of plant materials for ecological restoration: insights from the applied and basic literature.	Journal of Applied Ecology 54(1): 102-115.
Espeland, E. K., R. C. Johnson and M. E. Horning	2018	Plasticity in native perennial grass populations: Implications for restoration.	Evolutionary Applications 11(3): 340-349.
Estrada, A., C. Meireles, I. Morales-Castilla, P. Poschlod, D. Vieites, M. B. Araujo and R. Early	2015	Species' intrinsic traits inform their range limitations and vulnerability under environmental change.	Global Ecology and Biogeography 24(7): 849-858.
Etterson, J. R.	2004	Evolutionary potential of Chamaecrista fasciculata in relation to climate change. I. Clinal patterns of selection along an environmental gradient in the great plains.	Evolution 58(7): 1446-1458.
Etterson, J. R.	2004	Evolutionary potential of Chamaecrista fasciculata in relation to climate change. II. Genetic architecture of three populations reciprocally planted along an environmental gradient in the great plains.	Evolution 58(7): 1459-1471.
Etterson, J. R., M. W. Cornett, M. A. White and L. C. Kavajecz	2020	Assisted migration across fixed seed zones detects adaptation lags in two major North American tree species.	Ecol Appl 30(5): e02092.
Evans, L. M., S. Kaluthota, D. W. Pearce, G. J. Allan, K. Floate, S. B. Rood and T. G. Whitham	2016	Bud phenology and growth are subject to divergent selection across a latitudinal gradient in Populus angustifolia and impact adaptation across the distributional range and associated arthropods.	Ecol Evol 6(13): 4565-4581.
Farjat, A., B. J. Reich, J. Guinness, R. Whetten, S. McKeand and F. Isik	2017	Optimal Seed Deployment Under Climate Change Using Spatial Models: Application to Loblolly Pine in the Southeastern US.	Journal of the American Statistical Association 112(519): 909-920.
Farjat, A. E., F. Isik, B. J. Reich, R. W. Whetten and S. E. McKeand	2015	Modeling Climate Change Effects on the Height Growth of Loblolly Pine.	Forest Science 61(4): 703-715.
Fern, P. es, C. Maguas and O. Correia	2017	Combined effects of climate, habitat, and disturbance on seedling establishment of Pinus pinaster and Eucalyptus globulus.	Plant Ecology 218(5): 501-515.
Fern, M. E. ez, J. E. Gyenge, S. Varela and M. de Urquiza	2017	Effects of the time of drought occurrence within the growing season on growth and survival of Pinus ponderosa seedlings.	Trees-Structure and Function 28(3): 745-756.
Frank, A., C. Heiri and A. D. Kupferschmid	2019	Growth and quality of Fagus sylvatica saplings depend on seed source, site, and browsing intensity.	Ecosphere 10(1).
Frank, A., A. R. Pluess, G. T. Howe, C. Sperisen and C. Heiri	2017	Quantitative genetic differentiation and phenotypic plasticity of European beech in a heterogeneous landscape: Indications for past climate adaptation.	Perspectives in Plant Ecology Evolution and Systematics 26: 1-13.
Frank, A., C. Sperisen, G. T. Howe, P. Brang, L. Walthert, J. B. St Clair and C. Heiri	2017	Distinct genecological patterns in seedlings of Norway spruce and silver fir from a mountainous landscape.	Ecology 98(1): 211-227.
Gallagher, R. V., R. O. Makinson, P. M. Hogbin and N. Hancock	2015	Assisted colonization as a climate change adaptation tool.	Austral Ecology 40(1): 12-20.
Galliart, M., S. Sabates, H. Tetreault, A. DeLaCruz, J. Bryant, J. Alsdurf, M. Knapp, N. M. Bello, S. G. Baer, B. R. Maricle, D. J. Gibson, J. Poland, P. St Amand, N. Unruh, O. Parrish and L. Johnson	2020	Adaptive genetic potential and plasticity of trait variation in the foundation prairie grassAndropogon gerardiiacross the US Great Plains' climate gradient: Implications for climate change and restoration.	Evolutionary Applications 13(9): 2333-2356.
Gao, L., S. Tang, L. Zhuge, M. Nie, Z. Zhu, B. Li and J. Yang	2012	Spatial genetic structure in natural populations of Phragmites australis in a mosaic of saline habitats in the Yellow River Delta, China.	PLoS One 7(8): e43334.
Gao, R. M., X. D. Shi and J. R. Wang	2017	Comparative studies of the response of larch and birch seedlings from two origins to water deficit.	New Zealand Journal of Forestry Science 47.
Garcia, F., A. ez, J. M. Iriondo and A. Escudero	2012	Inbreeding at the edge: does inbreeding depression increase under more stressful conditions?	Oikos 121(9): 1435-1445.
Garcia-Nogales, A., J. C. Linares, R. G. Laureano, J. I. Seco and J. Merino	2016	Range-wide variation in life-history phenotypes: spatiotemporal plasticity across the latitudinal gradient of the evergreen oak Quercus ilex.	Journal of Biogeography 43(12): 2366-2379.
Garcia-Serrano, H., J. Escarre and F. X. Sans	2004	Factors that limit the emergence and establishment of the related aliens Senecio inaequidens and Senecio pterophorus and the native Senecio malacitanus in Mediterranean climate.	Canadian Journal of Botany-Revue Canadienne De Botanique 82(9): 1346-1355.
George, J. P., M. Grabner, F. Campelo, S. Karanitsch-Ackerl, K. Mayer, R. T. Klumpp and S. Schuler	2019	Intra-specific variation in growth and wood density traits under water-limited conditions: Long-term-, short-term-, and sudden responses of four conifer tree species.	Sci Total Environ 660: 631-643.
Gibson, A., E. P. Bachelard and K. T. Hubick	1995	Relationship between Climate and Provenance Variation in Eucalyptus-Camaldulensis Dehnh.	Australian Journal of Plant Physiology 22(3): 453-460.
Gibson, A. L., Espel, E. K., V. Wagner and C. R. Nelson	2016	Can local adaptation research in plants inform selection of native plant materials? An analysis of experimental methodologies.	Evolutionary Applications 9(10): 1219-1228.
Giencke, L. M., R. C. Denhof, L. K. Kirkman, O. S. Stuber and S. T. Brantley	2018	Seed sourcing for longleaf pine ground cover restoration: using plant performance to assess seed transfer zones and home-site advantage.	Restoration Ecology 26(6): 1127-1136.
Gillard, M. B., R. E. Drenovsky, G. Thiebaut, M. Tarayre, C. J. Futrell and B. J. Grewell	2020	Seed source regions drive fitness differences in invasive macrophytes.	Am J Bot 107(5): 749-760.
Gonzalez-Benecke, C. A. and T. A. Martin	2010	Water availability and genetic effects on water relations of loblolly pine (Pinus taeda) stands.	Tree Physiol 30(3): 376-392.
Goodrich, B. A., K. M. Waring and T. E. Kolb	2016	Genetic variation in Pinus strobiformis growth and drought tolerance from southwestern US populations.	Tree Physiol 36(10): 1219-1235.
Gorton, A. J., P. Tiffin and D. A. Moeller	2019	Does adaptation to historical climate shape plant responses to future rainfall patterns? A rainfall manipulation experiment with common ragweed.	Oecologia 190(4): 941-953.
Gray, F., A. Cochrane and P. Poot	2019	Provenance modulates sensitivity of stored seeds of the Australian native grass Neurachne alopecuroidea to temperature and moisture availability.	Australian Journal of Botany 67(2): 106-115.
Gray, L. K., T. Gylander, M. S. Mbogga, P. Y. Chen and A. Hamann	2011	Assisted migration to address climate change: recommendations for aspen reforestation in western Canada.	Ecol Appl 21(5): 1591-1603.
Gray, L. K., D. Rweyongeza, A. Hamann, S. John and B. R. Thomas	2016	Developing management strategies for tree improvement programs under climate change: Insights gained from long-term field trials with lodgepole pine.	Forest Ecology and Management 377: 128-138.
Griesbauer, H. P., D. S. Green and G. A. O'Neill	2011	Using a spatiotemporal climate model to assess population-level Douglas-fir growth sensitivity to climate change across large climatic gradients in British Columbia, Canada.	Forest Ecology and Management 261(3): 589-600.
Gross, C. L., M. Fatemi and I. H. Simpson	2017	Seed provenance for changing climates: early growth traits of nonlocal seed are better adapted to future climatic scenarios, but not to current field conditions.	Restoration Ecology 25(4): 577-586.
Guerrant, E. O., K. Havens and P. Vitt	2014	Sampling for Effective Ex Situ Plant Conservation.	International Journal of Plant Sciences 175(1): 11-20.
Gugger, P. F., C. T. Liang, V. L. Sork, P. Hodgskiss and J. W. Wright	2018	Applying landscape genomic tools to forest management and restoration of Hawaiian koa (Acacia koa) in a changing environment.	Evol Appl 11(2): 231-242.
Gull, B. A., T. Persson, A. Fedorkov and T. J. Mullin	2018	Longitudinal differences in Scots pine shoot elongation.	Silva Fennica 52(5).
Guo, Y., Y. Lu, Y. A. El-Kassaby, L. Feng, G. B. Wang and T. L. Wang	2019	Predicting growth and habitat responses of Ginkgo biloba L. to climate change.	Annals of Forest Science 76(4).
Hamann, A. and S. N. Aitken	2013	Conservation planning under climate change: accounting for adaptive potential and migration capacity in species distribution models.	Diversity and Distributions 19(3): 268-280.
Hamann, A., T. Gylander and P. Y. Chen	2011	Developing seed zones and transfer guidelines with multivariate regression trees.	Tree Genetics & Genomes 7(2): 399-408.
Hancock, N. and L. Hughes	2014	Turning up the heat on the provenance debate: Testing the 'local is best' paradigm under heatwave conditions.	Austral Ecology 39(5): 600-611.
Hancock, N., M. R. Leishman and L. Hughes	2013	Testing the Local Provenance Paradigm: A Common Garden Experiment in Cumberland Plain Woodland, Sydney, Australia.	Restoration Ecology 21(5): 569-577.
Hargreaves, A. L. and C. G. Eckert	2014	Evolution of dispersal and mating systems along geographic gradients: implications for shifting ranges.	Functional Ecology 28(1): 5-21.
Harrison, P. A., R. E. Vaillancourt, R. M. B. Harris and B. M. Potts	2017	Integrating climate change and habitat fragmentation to identify candidate seed sources for ecological restoration.	Restoration Ecology 25(4): 524-531.
Havens, K., P. Vitt, S. Still, A. T. Kramer, J. B. Fant and K. Schatz	2015	Seed Sourcing for Restoration in an Era of Climate Change.	Natural Areas Journal 35(1): 122-133.
Hern, F. ez, M. Poverene, A. Garayalde and A. Presotto	2019	Re-establishment of latitudinal clines and local adaptation within the invaded area suggest rapid evolution of seed traits in Argentinean sunflower (Helianthus annuus L.).	Biological Invasions 21(8): 2599-2612.
Hibbs, D. E., S. S. Chan, M. Castellano and C. H. Niu	1995	Response of Red Alder Seedlings to Co2 Enrichment and Water-Stress.	New Phytologist 129(4): 569-577.
Higgins, S. I. and D. M. Richardson	1999	Predicting Plant Migration Rates in a Changing World: The Role of Long-Distance Dispersal.	Am Nat 153(5): 464-475.
Holtmeier, F. K. and G. Broll	2011	Response of Scots Pine (Pinus sylvestris) to Warming Climate at Its Altitudinal Limit in Northernmost Subarctic Finland.	Arctic 64(3): 269-280.
Howe, A. A., S. M. Landhausser, O. T. Burney, J. N. Long, R. D. Violett and K. E. Mock	2020	Exploring seedling-based aspen (Populus tremuloides) restoration near range limits in the Intermountain West, USA.	Forest Ecology and Management 476.
Howe, H. F.	2014	Diversity Storage: Implications for tropical conservation and restoration.	Global Ecology and Conservation 2: 349-358.
Hoyle, G. L., H. Cordiner, R. B. Good and A. B. Nicotra	2014	Effects of reduced winter duration on seed dormancy and germination in six populations of the alpine herb Aciphyllya glacialis (Apiaceae).	Conserv Physiol 2(1): cou015.
Hu, X. G., J. F. Mao, Y. A. El-Kassaby, K. H. Jia, S. Q. Jiao, S. S. Zhou, Y. Li, N. C. Coops and T. L. Wang	2019	Local Adaptation and Response of Platycladus orientalis (L.) Franco Populations to Climate Change.	Forests 10(8).
Hu, X. G., T. L. Wang, S. S. Liu, S. Q. Jiao, K. H. Jia, S. S. Zhou, Y. Q. Jin, Y. Li, Y. A. El-Kassaby and J. F. Mao	2017	Predicting Future Seed Sourcing of Platycladus orientalis (L.) for Future Climates Using Climate Niche Models.	Forests 8(12).
Iakovoglou, V., I. Takos, G. Pantazi, A. Pipsou and M. Neofotistou	2020	Growth responses of seedlings produced by parent seeds from specific altitudes.	Journal of Forestry Research 31(6): 2121-2127.
Ibanez, I., J. S. Clark, S. LaDeau and J. HilleRisLambers	2007	Exploiting temporal variability to understand tree recruitment response to climate change.	Ecological Monographs 77(2): 163-177.
Ishizuka, W. and S. Goto	2012	Modeling intraspecific adaptation of Abies sachalinensis to local altitude and responses to global warming, based on a 36-year reciprocal transplant experiment.	Evol Appl 5(3): 229-244.
Iverson, L. R., M. W. Schwartz and A. M. Prasad	2004	How fast and far might tree species migrate in the eastern United States due to climate change?	Global Ecology and Biogeography 13(3): 209-219.
Ivetic, V., J. Devetakovic, M. Nonic, D. Stankovic and M. Sijacic-Nikolic	2016	Genetic diversity and forest reproductive material - from seed source selection to planting.	Iforest-Biogeosciences and Forestry 9: 801-812.
Jarvie, S. and J. C. Svenning	2018	Using species distribution modelling to determine opportunities for trophic rewilding under future scenarios of climate change.	Philosophical Transactions of the Royal Society B-Biological Sciences 373(1761).
Jia, K. H., W. Zhao, P. A. Maier, X. G. Hu, Y. Jin, S. S. Zhou, S. Q. Jiao, Y. A. El-Kassaby, T. Wang, X. R. Wang and J. F. Mao	2020	Landscape genomics predicts climate change-related genetic offset for the widespread Platycladus orientalis (Cupressaceae).	Evol Appl 13(4): 665-676.
Johnsen, O., T. Skroppa, G. M. J. Mohren, K. Kramer and S. Sabate	1998 Parents of Norway spruce adjust the performance of their progeny according to changes in climate and weather conditions during female flowering - A review.
Jordan, R., S. M. Prober, A. A. Hoffmann and S. K. Dillon	2020	Combined Analyses of Phenotype, Genotype and Climate Implicate Local Adaptation as a Driver of Diversity inEucalyptus microcarpa(Grey Box).	Forests 11(5).
Joyce, D. G. and G. E. Rehfeldt	2017	Management strategies for black spruce (Picea mariana (Mill.) BSP) in the face of climate change: climatic niche, clines, climatypes, and seed transfer.	Forestry 90(4): 594-610.
Kane, K., D. M. Debinski, C. Anderson, J. D. Scasta, D. M. Engle and J. R. Miller	2017	Using Regional Climate Projections to Guide Grassland Community Restoration in the Face of Climate Change.	Frontiers in Plant Science 8.
Kapeller, S., M. J. Lexer, T. Geburek, J. Hiebl and S. Schueler	2012	Intraspecific variation in climate response of Norway spruce in the eastern Alpine range: Selecting appropriate provenances for future climate.	Forest Ecology and Management 271: 46-57.
Karlman, L., A. Fries, O. Martinsson and J. Westin	2011	Juvenile growth of provenances and open pollinated families of four Russian larch species (Larix Mill.) in Swedish field tests.	Silvae Genetica 60(5): 165-177.
Keith, D. A. and P. J. Myerscough	2016	Population variation in germination traits and its implications for responses to climate change in a fire-prone plant species complex.	Plant Ecology 217(6): 781-788.
Kellman, M.	2004	Sugar maple (Acer saccharum Marsh.) establishment in boreal forest: results of a transplantation experiment.	Journal of Biogeography 31(9): 1515-1522.
Kettenring, K. M. and E. E. Tarsa	2020	Need to Seed? Ecological, Genetic, and Evolutionary Keys to Seed-Based Wetland Restoration.	Frontiers in Environmental Science 8.
Kilkenny, F. F.	2015	Genecological Approaches to Predicting the Effects of Climate Change on Plant Populations.	Natural Areas Journal 35(1): 152-164.
Koralewski, T. E., H. H. Wang, W. E. Grant and T. D. Byram	2015	Plants on the move: Assisted migration of forest trees in the face of climate change.	Forest Ecology and Management 344: 30-37.
Koskela, J., B. Vinceti, W. Dvorak, D. Bush, I. K. Dawson, J. Loo, E. D. Kjaer, C. Navarro, C. Padolina, S. Bordacs, R. Jamnadass, L. Graudal and L. Ramamonjisoa	2014	Utilization and transfer of forest genetic resources: A global review.	Forest Ecology and Management 333: 22-34.
Kreyling, J., G. L. B. Wiesenberg, D. Thiel, C. Wohlfart, G. Huber, J. Walter, A. Jentsch, M. Konnert and C. Beierkuhnlein	2012	Cold hardiness of Pinus nigra Arnold as influenced by geographic origin, warming, and extreme summer drought.	Environmental and Experimental Botany 78: 99-108.
Krushelnycky, P. D., J. M. Felts, R. H. Robichaux, K. E. Barton, C. M. Litton and M. D. Brown	2020	Clinal variation in drought resistance shapes past population declines and future management of a threatened plant.	Ecological Monographs 90(1).
Kueppers, L. M., E. Conlisk, C. Castanha, A. B. Moyes, M. J. Germino, P. de Valpine, M. S. Torn and J. B. Mitton	2017	Warming and provenance limit tree recruitment across and beyond the elevation range of subalpine forest.	Glob Chang Biol 23(6): 2383-2395.
Kupferschmid, A. D. and C. Heiri	2019	Recovery of Abies alba and Picea abies saplings to browsing and frost damage depends on seed source.	Ecol Evol 9(6): 3335-3354.
Kurjak, D., A. Konopkova, J. Kmet, M. Mackova, J. Frydl, M. Zivcak, S. Palmroth, L. Ditmarova and D. Gomory	2019	Variation in the performance and thermostability of photosystem II in European beech (Fagus sylvatica L.) provenances is influenced more by acclimation than by adaptation.	European Journal of Forest Research 138(1): 79-92.
Kvaalen, H. and O. Johnsen	2008	Timing of bud set in Picea abies is regulated by a memory of temperature during zygotic and somatic embryogenesis.	New Phytologist 177(1): 49-59.
Lawler, J. J., R. S. Ostfeld and W. H. Schlesinger	2009 Climate Change Adaptation Strategies for Resource Management and Conservation Planning.
Ledig, F. T. and J. H. Kitzmiller	1992	Genetic Strategies for Reforestation in the Face of Global Climate Change.	Forest Ecology and Management 50(1-2): 153-169.
Leibing, C., J. Signer, M. van Zonneveld, A. Jarvis and W. Dvorak	2013	Selection of Provenances to Adapt Tropical Pine Forestry to Climate Change on the Basis of Climate Analogs.	Forests 4(1): 155-178.
Leibing, C., M. Zonneveld, A. Jarvis and W. Dvorak	2009	Adaptation of tropical and subtropical pine plantation forestry to climate change: Realignment of Pinus patula and Pinus tecunumanii genotypes to 2020 planting site climates.	Scandinavian Journal of Forest Research 24(6): 483-493.
Leites, L. P., A. P. Robinson, G. E. Rehfeldt, J. D. Marshall and N. L. Crookston	2012	Height-growth response to climatic changes differs among populations of Douglas-fir: a novel analysis of historic data.	Ecological Applications 22(1): 154-165.
Lepais, O. and C. F. Bacles	2014	Two are better than one: combining landscape genomics and common gardens for detecting local adaptation in forest trees.	Molecular Ecology 23(19): 4671-4673.
Li, W. S., J. A. Kershaw, K. K. L. Costanza and A. R. Taylor	2020	Evaluating the potential of red spruce (Picea rubens Sarg.) to persist under climate change using historic provenance trials in eastern Canada.	Forest Ecology and Management 466.
Liepe, K. J., A. Hamann, P. Smets, C. R. Fitzpatrick and S. N. Aitken	2016	Adaptation of lodgepole pine and interior spruce to climate: implications for reforestation in a warming world.	Evol Appl 9(2): 409-419.
Liesebach, M.	2012	The International Beech Provenance Experiment 1993/95-Description of the six chosen provenances and the two trial sites.	Landbauforschung 62(4): 159-167.
Liesebach, M., B. Degen and F. Scholz	1999	On the adaptability in flushing of beech (Fagus sylvatica L.).	Berichte Uber Landwirtschaft 77(1): 128-133.
Liesebach, M., A. O. Konig, E. Ujvari-Jarmay, G. MullerStarck and R. Schubert	2001 Provenance-environment interactions of Norway spruce
Liu, Y., T. L. Wang and Y. A. El-Kassaby	2016	Contributions of dynamic environmental signals during life-cycle transitions to early life-history traits in lodgepole pine (Pinus contorta Dougl.).	Biogeosciences 13(10): 2945-2958.
Lopez, R., A. Zehavi, J. Climent and L. Gil	2007	Contrasting ecotypic differentiation for growth and survival in Pinus canariensis.	Australian Journal of Botany 55(7): 759-769.
Lu, P. X., D. G. Joyce and R. W. Sinclair	2003	Effect of selection on shoot elongation rhythm of eastern white pine (Pinus strobus L.) and its implications to seed transfer in Ontario.	Forest Ecology and Management 182(1-3): 161-173.
Lu, P. X. and R. Z. Man	2011	Assessment of assisted migration effects on spring bud flush in white spruce (Picea glauca [Moench] Voss) seedlings.	Forestry Chronicle 87(3): 391-397.
Lu, P. X., W. C. Parker, S. J. Colombo and R. Z. Man	2016	Restructuring tree provenance test data to conform to reciprocal transplant experiments for detecting local adaptation.	Journal of Applied Ecology 53(4): 1088-1097.
Lu, P. X., W. H. Parker, M. Cherry, S. Colombo, W. C. Parker, R. Z. Man and N. Roubal	2014	Survival and growth patterns of white spruce (Picea glauca [Moench] Voss) rangewide provenances and their implications for climate change adaptation.	Ecology and Evolution 4(12): 2360-2374.
Lucas-Borja, M. E., D. Candel-Perez, P. A. Tiscar, B. Prevosto and J. Hedo	2017	Pinus nigra Arn. ssp salzmannii early recruitment and initial seedling growth in warmer and drier locations: the role of seed and soil provenance.	Plant Ecology 218(6): 761-772.
Lunt, I. D., M. Byrne, J. J. Hellmann, N. J. Mitchell, S. T. Garnett, M. W. Hayward, T. G. Martin, E. McDonald-Maddden, S. E. Williams and K. K. Zander	2013	Using assisted colonisation to conserve biodiversity and restore ecosystem function under climate change.	Biological Conservation 157: 172-177.
Lustenhouwer, N., E. V. Moran and J. M. Levine	2017	Trait correlations equalize spread velocity across plant life histories.	Global Ecology and Biogeography 26(12): 1398-1407.
Lyon, N. J., D. M. Debinski and I. Rangwala	2019	Evaluating the Utility of Species Distribution Models in Informing Climate Change-Resilient Grassland Restoration Strategy.	Frontiers in Ecology and Evolution 7.
Madaj, A. M., S. G. Michalski and W. Durka	2020	Establishment rate of regional provenances mirrors relative share and germination rate in a climate change experiment.	Ecosphere 11(3).
Magnoli, S. M.	2020	Rapid adaptation (or not) in restored plant populations.	Evolutionary Applications 13(8): 2030-2037.
Malmqvist, C., E. Wallin, A. Lindstrom and H. Sall	2017	Differences in bud burst timing and bud freezing tolerance among interior and coastal seed sources of Douglas fir.	Trees-Structure and Function 31(6): 1987-1998.
Malyshev, A. V., M. A. Arfin Khan, C. Beierkuhnlein, M. J. Steinbauer, H. A. Henry, A. Jentsch, J. Dengler, E. Willner and J. Kreyling	2016	Plant responses to climatic extremes: within-species variation equals among-species variation.	Glob Chang Biol 22(1): 449-464.
Marquis, B., Y. Bergeron, M. Simard and F. Tremblay	2020	Growing-season frost is a better predictor of tree growth than mean annual temperature in boreal mixedwood forest plantations.	Global Change Biology 26(11): 6537-6554.
Martin-Alcon, S., L. Coll and A. Ameztegui	2016	Diversifying sub-Mediterranean pinewoods with oak species in a context of assisted migration: responses to local climate and light environment.	Applied Vegetation Science 19(2): 254-266.
Martinez-Berdeja, A., J. A. Hamilton, A. Bontemps, J. Schmitt and J. W. Wright	2019	Evidence for population differentiation among Jeffrey and Ponderosa pines in survival, growth and phenology.	Forest Ecology and Management 434: 40-48.
Martinez-Sifuentes, A. R., J. Villanueva-Diaz, U. Manzanilla-Quinones, J. L. Becerra-Lopez, J. A. Hernandez-Herrera, J. Estrada-Avalos and A. H. Velazquez-Perez	2020	Spatial modeling of the ecological niche of Pinus greggii Engelm. (Pinaceae): a species conservation proposal in Mexico under climatic change scenarios.	Iforest-Biogeosciences and Forestry 13: 426-434.
Martins, K., P. F. Gugger, J. Llanderal-Mendoza, A. Gonzalez-Rodriguez, S. T. Fitz-Gibbon, J. L. Zhao, H. Rodriguez-Correa, K. Oyama and V. L. Sork	2018	Landscape genomics provides evidence of climate-associated genetic variation in Mexican populations of Quercus rugosa.	Evol Appl 11(10): 1842-1858.
Massatti, R., H. R. Prendeville, S. Larson, B. A. Richardson, B. Waldron and F. F. Kilkenny	2018	Population history provides foundational knowledge for utilizing and developing native plant restoration materials.	Evol Appl 11(10): 2025-2039.
Mataruga, M., D. L. Haase and V. Isajev	2010	Dynamics of seed imbibition and germination of Austrian pine (Pinus nigra Arnold) from extreme habitat conditions within five Balkan provenances.	New Forests 40(2): 229-242.
Mateo, R. G., A. Gaston, M. J. Aroca-Fernandez, O. Broennimann, A. Guisan, S. Saura and J. I. Garcia-Vinas	2019	Hierarchical species distribution models in support of vegetation conservation at the landscape scale.	Journal of Vegetation Science 30(2): 386-396.
Matias, L. and A. S. Jump	2014	Impacts of predicted climate change on recruitment at the geographical limits of Scots pine.	Journal of Experimental Botany 65(1): 299-310.
McLane, S. C. and S. N. Aitken	2012	Whitebark pine (Pinus albicaulis) assisted migration potential: testing establishment north of the species range.	Ecol Appl 22(1): 142-153.
Meineri, E., J. Spindelbock and V. Vandvik	2013	Seedling emergence responds to both seed source and recruitment site climates: a climate change experiment combining transplant and gradient approaches.	Plant Ecology 214(4): 607-619.
Meng, F., L. Zhang, Z. Zhang, L. Jiang, Y. Wang, J. Duan, Q. Wang, B. Li, P. Liu, H. Hong, W. Lv, W. Renzeng, Z. Wang, C. Luo, T. Dorji, H. Zhou, M. Du, Y. Luo and S. Wang	2020	Enhanced spring temperature sensitivity of carbon emission links to earlier phenology.	Sci Total Environ 745: 140999.
Milesi, P., M. Berlin, J. Chen, M. Orsucci, L. L. Li, G. Jansson, B. Karlsson and M. Lascoux	2019	Assessing the potential for assisted gene flow using past introduction of Norway spruce in southern Sweden: Local adaptation and genetic basis of quantitative traits in trees.	Evolutionary Applications 12(10): 1946-1959.
Miller, A. D., C. Nitschke, A. R. Weeks, W. L. Weatherly, S. D. Heyes, S. J. Sinclair, O. J. Holland, A. Stevenson, L. Broadhurst, S. E. Hoebee, C. D. H. Sherman and J. W. Morgan	2020	Genetic data and climate niche suitability models highlight the vulnerability of a functionally important plant species from south-eastern Australia.	Evol Appl 13(8): 2014-2029.
Mohan, J. E., J. S. Clark and W. H. Schlesinger	2004	Genetic variation in germination, growth, and survivorship of red maple in response to subambient through elevated atmospheric CO2.	Global Change Biology 10(2): 233-247.
Moler, E. R. V., G. Page, L. Flores-Renteria, C. G. Garms, J. B. Hull, H. F. Cooper, J. Swenson, S. Perks, K. M. Waring and A. V. Whipple	2021	A method for experimental warming of developing tree seeds with a common garden demonstration of seedling responses.	Plant Methods 17(1): 1.
Montwe, D., M. Isaac-Renton, A. Hamann and H. Spiecker	2016	Drought tolerance and growth in populations of a wide-ranging tree species indicate climate change risks for the boreal north.	Glob Chang Biol 22(2): 806-815.
Moser, B., J. D. Fridley, A. P. Askew and J. P. Grime	2011	Simulated migration in a long-term climate change experiment: invasions impeded by dispersal limitation, not biotic resistance.	Journal of Ecology 99(5): 1229-1236.
Moser, B., L. Walthert, M. Metslaid, U. Wasem and T. Wohlgemuth	2017	Spring water deficit and soil conditions matter more than seed origin and summer drought for the establishment of temperate conifers.	Oecologia 183(2): 519-530.
Mosner, E., K. Eimert, U. Huwe, B. Ziegenhagen, A. Janssen and I. Leyer	2017	Revisiting the provenance delineation of a widespread shrub, Frangula alnus-the role of spatial, temporal and environmental patterns.	Tree Genetics & Genomes 13(3).
Mukasyaf, A. A., K. Matsunaga, M. Tamura, T. Iki, A. Watanabe and M. G. Iwaizumi	2021	Reforestation or Genetic Disturbance: A Case Study of Pinus thunbergii in the Iki-no-Matsubara Coastal Forest (Japan).	Forests 12(1).
Muller, E., P. B. Eidesen, D. Ehrich and I. G. Alsos	2012	Frequency of local, regional, and long-distance dispersal of diploid and tetraploid Saxifraga oppositifolia (Saxifragaceae) to Arctic glacier forelands.	Am J Bot 99(3): 459-471.
Mummey, D. L., M. E. Herget, K. M. Hufford and L. Shreading	2016	Germination Timing and Seedling Growth of Poa secunda and the Invasive Grass, Bromus tectorum, in Response to Temperature: Evaluating Biotypes for Seedling Traits that Improve Establishment.	Ecological Restoration 34(3): 200-208.
Murray, B. R., A. H. D. Brown, C. R. Dickman and M. S. Crowther	2004	Geographical gradients in seed mass in relation to climate.	Journal of Biogeography 31(3): 379-388.
Myking, T.	2002	Evaluating genetic resources of forest trees by means of life history traits - a Norwegian example.	Biodiversity and Conservation 11(9): 1681-1696.
Newaz, M. S., Q. L. Dang and R. Z. Man	2018	Jack pine becomes more vulnerable to cavitation with increasing latitudes under doubled CO2 concentration.	Botany 96(2): 111-119.
Newaz, S., Q. L. Dang and R. Z. Man	2017	Eco-physiological potential of jack pine (Pinus banksiana) for assisted northward migration: interactions among photoperiod, [CO2] and moisture stress.	Nordic Journal of Botany 35(6): 633-643.
Nguyen, M. A., A. E. Ortega, K. Q. Nguyen, S. Kimball, M. L. Goulden and J. L. Funk	2016	Evolutionary responses of invasive grass species to variation in precipitation and soil nitrogen.	Journal of Ecology 104(4): 979-986.
Nigh, G.	2014	Mitigating the effects of climate change on lodgepole pine site height in British Columbia, Canada, with a transfer function.	Forestry 87(3): 377-387.
Notivol, E., L. Santos-del-Blanco, R. Chambel, J. Climent and R. Alia	2020	Seed Sourcing Strategies Considering Climate Change Forecasts: A Practical Test in Scots Pine.	Forests 11(11).
Offord, C. A., L. K. Guja, S. R. Turner and D. J. Merritt	2017	Seeds at the forefront: synthesis of the inaugural National Seed Science Forum and future directions in Australian seed science.	Australian Journal of Botany 65(8): 601-608.
Oleksyn, J., J. Modrzynski, M. G. Tjoelker, R. Zytkowiak, P. B. Reich and P. Karolewski	1998	Growth and physiology of Picea abies populations from elevational transects: common garden evidence for altitudinal ecotypes and cold adaptation.	Functional Ecology 12(4): 573-590.
O'Neill, G. A., A. Hamann and T. L. Wang	2008	Accounting for population variation improves estimates of the impact of climate change on species' growth and distribution.	Journal of Applied Ecology 45(4): 1040-1049.
O'Neill, G. A., M. Stoehr and B. Jaquish	2014	Quantifying safe seed transfer distance and impacts of tree breeding on adaptation.	Forest Ecology and Management 328: 122-130.
Ortiz-Bibian, M. A., D. Castellanos-Acuna, M. Gomez-Romero, R. Lindig-Cisneroe, M. A. Silva-Farias and C. Saenz-Romero	2019	VARIATION AMONG Abies religiosa (HBK) Schl. et Cham POPULATIONS ALONG AN ALTITUDINAL GRADIENT. I. SEED GERMINATION CAPACITY.	Revista Fitotecnia Mexicana 42(3): 301-308.
Ouedraogo, M., A. Raebild, A. Nikiema and E. D. Kjaer	2012	Evidence for important genetic differentiation between provenances of Parkia biglobosa from the Sudano-Sahelian zone of West Africa.	Agroforestry Systems 85(3): 489-503.
Pagel, J., M. Treurnicht, W. J. Bond, T. Kraaij, H. Nottebrock, A. Schutte-Vlok, J. Tonnabel, K. J. Esler and F. M. Schurr	2020	Mismatches between demographic niches and geographic distributions are strongest in poorly dispersed and highly persistent plant species.	Proceedings of the National Academy of Sciences of the United States of America 117(7): 3663-3669.
Park, I. W., T. Ramirez-Parada and S. J. Mazer	2021	Advancing frost dates have reduced frost risk among most North American angiosperms since 1980.	Global Change Biology 27(1): 165-176.
Parker, W. H.	2000	Rates of change of adaptive variation in Picea mariana visualized by GIS using a differential systematic coefficient.	New Forests 20(3): 259-276.
Parker, W. H. and A. vanNiejenhuis	1996	Regression-based focal point seed zones for Picea mariana from northwestern Ontario.	Canadian Journal of Botany-Revue Canadienne De Botanique 74(8): 1227-1235.
Parmesan, C. and M. E. Hanley	2015	Plants and climate change: complexities and surprises.	Ann Bot 116(6): 849-864.
Pedlar, J. H., D. W. McKenney, I. Aubin, T. Beardmore, J. Beaulieu, L. Iverson, G. A. O'Neill, R. S. Winder and C. Ste-Marie	2012	Placing Forestry in the Assisted Migration Debate.	Bioscience 62(9): 835-842.
Pedlar, J. H., D. W. McKenney, J. Beaulieu, S. J. Colombo, J. S. McLachlan and G. A. O'Neill	2011	The implementation of assisted migration in Canadian forests.	Forestry Chronicle 87(6): 766-777.
Perring, M. P., R. J. Standish, J. N. Price, M. D. Craig, T. E. Erickson, K. X. Ruthrof, A. S. Whiteley, L. E. Valentine and R. J. Hobbs	2015	Advances in restoration ecology: rising to the challenges of the coming decades.	Ecosphere 6(8).
Phondani, P. C., R. K. Maikhuri, V. S. Negi, L. S. Rawat, A. Bahuguna and K. P. Chamoli	2010	Effect of provenance variation and temperature on seed germination of Himalayan Silver Birch (Betula utilis D. Don) in Central Himalaya.	National Academy Science Letters-India 33(7-8): 221-226.
Pike, C., K. M. Potter, P. Berrang, B. Crane, J. Baggs, L. Leites and T. Luther	2020	New Seed-Collection Zones for the Eastern United States: The Eastern Seed Zone Forum.	Journal of Forestry 118(4): 444-451.
Pike, C. C., J. C. Warren and R. A. Montgomery	2017	Effects of artificial warming during quiescence on budbreak and growth of white spruce, Picea glauca.	Canadian Journal of Forest Research 47(11): 1538-1545.
Pluess, A. R. and P. Weber	2012	Drought-adaptation potential in Fagus sylvatica: linking moisture availability with genetic diversity and dendrochronology.	PLoS One 7(3): e33636.
Polle, A., I. McKee and L. Blaschke	2001	Altered physiological and growth responses to elevated [CO2] in offspring from holm oak (Quercus ilex L.) mother trees with lifetime exposure to naturally elevated [CO2].	Plant Cell and Environment 24(10): 1075-1083.
Popovic, V., A. Lucic, I. Kerkez Jankovic, L. Rakonjac and S. Bogdan	2020	VARIATIONS IN FRUIT TRAITS OF WILD CHERRY (Prunus avium L.) PROVENANCES IN SERBIA.	Sumarski List 144(11-12): 585-596.
Porter, R. B., T. Lacourse, B. J. Hawkins and A. Yanchuk	2013	Adaptive variation in growth, phenology, cold tolerance and nitrogen fixation of red alder (Alnus rubra Bong.).	Forest Ecology and Management 291: 357-366.
Potter, K. M. and W. W. Hargrove	2012	Determining suitable locations for seed transfer under climate change: a global quantitative method.	New Forests 43(5-6): 581-599.
Prevey, J. S., C. A. Harrington and J. B. St Clair	2018	The timing of flowering in Douglas-fir is determined by cool-season temperatures and genetic variation.	Forest Ecology and Management 409: 729-739.
Prud'homme, G. O., M. S. Lamhamedi, L. Benomar, A. Rainville, J. DeBlois, J. Bousquet and J. Beaulieu	2018	Ecophysiology and Growth of White Spruce Seedlings from Various Seed Sources along a Climatic Gradient Support the Need for Assisted Migration.	Frontiers in Plant Science 8.
Puglielli, G., F. J. Cuevas Roman, R. Catoni, J. M. Moreno Rojas, L. Gratani and L. Varone	2017	Provenance effect on carbon assimilation, photochemistry and leaf morphology in Mediterranean Cistus species under chilling stress.	Plant Biol (Stuttg) 19(4): 660-670.
Puglielli, G., A. Spoletini, G. Fabrini and L. Gratani	2017	Temperature responsiveness of seedlings maximum relative growth rate in three Mediterranean Cistus species.	Journal of Plant Ecology 10(2): 331-339.
Quan, X. K. and C. K. Wang	2018	Acclimation and adaptation of leaf photosynthesis, respiration and phenology to climate change: A 30-year Larix gmelinii common-garden experiment.	Forest Ecology and Management 411: 166-175.
Rahi, A. A., C. Bowling and D. Simpson	2010	A red pine provenance test in northwestern Ontario: 48-year results.	Forestry Chronicle 86(3): 348-353.
Ramalho, C. E., M. Byrne and C. J. Yates	2017	A Climate-Oriented Approach to Support Decision-Making for Seed Provenance in Ecological Restoration.	Frontiers in Ecology and Evolution 5.
Ranno, V., C. Blandino and G. G. del Galdo	2020	A comparative study on temperature and water potential thresholds for the germination of Betula pendula and two Mediterranean endemic birches, Betula aetnensis and Betula fontqueri.	Seed Science Research 30(4): 249-261.
Ratnaningrum, Y. W. N., S. Indrioko, A. Trihartono and B. McLellan	2015 Response of flowering and seed production of sandalwood
Razafimahatratra, A. R., T. Ramananantoandro, V. Razafimaharo and G. Chaix	2016	Provenance and progeny performances and genotype x environment interactions of Eucalyptus robusta grown in Madagascar.	Tree Genetics & Genomes 12(3).
Rehfeldt, G. E. and B. C. Jaquish	2010	Ecological impacts and management strategies for western larch in the face of climate-change.	Mitigation and Adaptation Strategies for Global Change 15(3): 283-306.
Ren, H., S. J. Zeng, L. N. Li, Q. M. Zhang, L. Yang, J. Wang, Z. F. Wang and Q. F. Guo	2012	Reintroduction of Tigridiopalma magnifica, a rare and Critically Endangered herb endemic to China.	Oryx 46(3): 391-398.
Richardson, B. A. and L. Chaney	2018	Climate-based seed transfer of a widespread shrub: population shifts, restoration strategies, and the trailing edge.	Ecol Appl 28(8): 2165-2174.
Richardson, B. A., S. G. Kitchen, R. L. Pendleton, B. K. Pendleton, M. J. Germino, G. E. Rehfeldt and S. E. Meyer	2014	Adaptive responses reveal contemporary and future ecotypes in a desert shrub.	Ecol Appl 24(2): 413-427.
Richter, S., T. Kipfer, T. Wohlgemuth, C. Calderon Guerrero, J. Ghazoul and B. Moser	2012	Phenotypic plasticity facilitates resistance to climate change in a highly variable environment.	Oecologia 169(1): 269-279.
Rico, Y.	2021	A comprehensive landscape genomics approach for seed sourcing strategies in landscapes under varying degrees of habitat disturbance.	Mol Ecol Resour 21(1): 14-17.
Riordan, E. C. and P. W. Rundel	2009	Modelling the distribution of a threatened habitat: the California sage scrub.	Journal of Biogeography 36(11): 2176-2188.
Risk, C., D. W. McKenney, J. Pedlar and P. Lu	2021	A compilation of North American tree provenance trials and relevant historical climate data for seven species.	Sci Data 8(1): 29.
Rossi, S.	2015	Local adaptations and climate change: converging sensitivity of bud break in black spruce provenances.	Int J Biometeorol 59(7): 827-835.
Rossi, S. and J. Bousquet	2014	The bud break process and its variation among local populations of boreal black spruce.	Frontiers in Plant Science 5.
rotia, R., P. K. Pal, S. Kumar and S. K. Vats	2017	Phenotypic variation between high and low elevation populations of Rumex nepalensis in the Himalayas is driven by genetic differentiation.	Acta Physiologiae Plantarum 39(4).
Rotllan-Puig, X. and A. Traveset	2016	Declining relict plants: Climate effect or seed dispersal disruption? A landscape-scale approach.	Basic and Applied Ecology 17(1): 81-91.
Royer, D. L., L. A. Meyerson, K. M. Robertson and J. M. Adams	2009	Phenotypic plasticity of leaf shape along a temperature gradient in Acer rubrum.	PLoS One 4(10): e7653.
Rozas, V., L. Sampedro, C. Vazquez-Gonzalez, A. Solla, M. Vivas, M. J. Lombardero and R. Zas	2020	Site conditions exert more control than genetic differentiation on modulation of secondary growth and climate sensitivity of Pinus pinaster.	Dendrochronologia 63.
Ruano, I., R. Manso, M. Fortin and F. Bravo	2015	Extreme climate conditions limit seed availability to successfully attain natural regeneration of Pinus pinaster in sandy areas of central Spain.	Canadian Journal of Forest Research 45(12): 1795-1802.
Rudgers, J. A. and A. L. Swafford	2009	Benefits of a fungal endophyte in Elymus virginicus decline under drought stress.	Basic and Applied Ecology 10(1): 43-51.
Ruiz-Talonia, L. F., N. M. Sanchez-Vargas, J. S. Bayuelo-Jimenez, S. I. Lara-Cabrera and C. Saenz-Romero	2014	Altitudinal genetic variation among native Pinus patula provenances: performance in two locations, seed zone delineation and adaptation to climate change.	Silvae Genetica 63(4): 139-149.
Russell, M. B., M. A. Windmuller-Campione, B. D. Anderson and A. J. David	2020	Assessing and modeling total height and diameter increment of ponderosa pine planted in Minnesota, USA.	New Forests 51(3): 507-522.
Rweyongeza, D. M.	2011	Pattern of genotype-environment interaction in Picea glauca (Moench) Voss in Alberta, Canada.	Annals of Forest Science 68(2): 245-253.
Saenz-Romero, C., J. Beaulieu and G. E. Rehfeldt	2011	ALTITUDINAL GENETIC VARIATION AMONG Pinus patula POPULATIONS FROM OAXACA, MEXICO, IN GROWTH CHAMBERS SIMULATING GLOBAL WARMING TEMPERATURES.	Agrociencia 45(3): 399-411.
Saenz-Romero, C., R. R. Guzman-Reyna and G. E. Rehfeldt	2006	Altitudinal genetic variation among Pinus oocarpa populations in Michoacan, Mexico - Implications for seed zoning, conservation, tree breeding and global warming.	Forest Ecology and Management 229(1-3): 340-350.
Saenz-Romero, C., A. Kremer, L. Nagy, E. Ujvari-Jarmay, A. Ducousso, A. Koczan-Horvath, J. K. Hansen and C. Matyas	2019	Common garden comparisons confirm inherited differences in sensitivity to climate change between forest tree species.	Peerj 7.
Saenz-Romero, C., G. O'Neill, S. N. Aitken and R. Lindig-Cisneros	2021	Assisted Migration Field Tests in Canada and Mexico: Lessons, Limitations, and Challenges.	Forests 12(1).
Saenz-Romero, C., G. E. Rehfeldt, J. M. Ortega-Rodriguez, M. C. Marin-Togo and X. Madrigal-Sanchez	2015	Pinus Leiophylla Suitable Habitat for 1961-1990 and Future Climate.	Botanical Sciences 93(4): 709-718.
Saenz-Romero, C., G. E. Rehfeldt, J. C. Soto-Correa, S. Aguilar-Aguilar, V. Zamarripa-Morales and J. Lopez-Upton	2012	ALTITUDINAL GENETIC VARIATION AMONG Pinus pseudostrobus POPULATIONS FROM MICHOACAN, MEXICO. TWO LOCATION SHADEHOUSE TEST RESULTS.	Revista Fitotecnia Mexicana 35(2): 111-121.
Salmela, M. J., S. Cavers, W. Wachowiak, J. E. Cottrell, G. R. Iason and R. A. Ennos	2010	Understanding the evolution of native pinewoods in Scotland will benefit their future management and conservation.	Forestry 83(5): 535-545.
Samis, K. E., J. R. Stinchcombe and C. J. Murren	2019	Population climatic history predicts phenotypic responses in novel environments for Arabidopsis thaliana in North America.	Am J Bot 106(8): 1068-1080.
Sang, Z., J. Sebastian-Azcona, A. Hamann, A. Menzel and U. Hacke	2019	Adaptive limitations of white spruce populations to drought imply vulnerability to climate change in its western range.	Evol Appl 12(9): 1850-1860.
Sanz, R., F. Pulido and J. J. Camarero	2011	Boreal trees in the Mediterranean: recruitment of downy birch (Betula alba) at its southern range limit.	Annals of Forest Science 68(4): 793-802.
Savolainen, O., T. Pyhajarvi and T. Knurr	2007	Gene flow and local adaptation in trees.	Annual Review of Ecology Evolution and Systematics 38: 595-619.
Savva, Y., B. Denneler, A. Koubaa, F. Tremblay, Y. Bergeron and M. G. Tjoelker	2007	Seed transfer and climate change effects on radial growth of jack pine populations in a common garden in Petawawa, Ontario, Canada.	Forest Ecology and Management 242(2-3): 636-647.
Savva, Y. V., F. H. Schweingruber, N. A. Kuzmina and E. A. Vaganov	2002	Sensitivity of diameter growth to annual weather conditions in Scots pine provenances at a Central Siberian location.	Silvae Genetica 51(2-3): 49-55.
Schiop, S. T., M. Al Hassan, A. F. Sestras, M. Boscaiu, R. E. Sestras and O. Vicente	2017	Biochemical responses to drought, at the seedling stage, of several Romanian Carpathian populations of Norway spruce (Picea abies L. Karst).	Trees-Structure and Function 31(5): 1479-1490.
Schoettle, A. W. and J. D. Coop	2017	Range-wide conservation of Pinus aristata: a genetic collection with ecological context for proactive management today and resources for tomorrow.	New Forests 48(2): 181-199.
Schreiber, S. G., C. Ding, A. Hamann, U. G. Hacke, B. R. Thomas and J. S. Brouard	2013	Frost hardiness vs. growth performance in trembling aspen: an experimental test of assisted migration.	Journal of Applied Ecology 50(4): 939-949.
Schreiber, S. G., U. G. Hacke and A. Hamann	2015	Variation of xylem vessel diameters across a climate gradient: insight from a reciprocal transplant experiment with a widespread boreal tree.	Functional Ecology 29(11): 1392-1401.
Schurr, F. M., J. Pagel, J. S. Cabral, J. Groeneveld, O. Bykova, R. B. O'Hara, F. Hartig, W. D. Kissling, H. P. Linder, G. F. Midgley, B. Schroder, A. Singer and N. E. Zimmermann	2012	How to understand species' niches and range dynamics: a demographic research agenda for biogeography.	Journal of Biogeography 39(12): 2146-2162.
Schwartz, M. W., L. R. Iverson and A. M. Prasad	2001	Predicting the potential future distribution of four tree species in ohio using current habitat availability and climatic forcing.	Ecosystems 4(6): 568-581.
Sebastian-Azcona, J., U. G. Hacke and A. Hamann	2018	Adaptations of white spruce to climate: strong intraspecific differences in cold hardiness linked to survival.	Ecol Evol 8(3): 1758-1768.
Sebastian-Azcona, J., A. Hamann, U. G. Hacke and D. Rweyongeza	2019	Survival, growth and cold hardiness tradeoffs in white spruce populations: Implications for assisted migration.	Forest Ecology and Management 433: 544-552.
Seddon, P. J.	2010	From Reintroduction to Assisted Colonization: Moving along the Conservation Translocation Spectrum.	Restoration Ecology 18(6): 796-802.
Seho, M., D. Kavaliauskas, J. R. G. Kleinschmit, M. Karopka and B. Fussi	2018	Wild Service Tree - Importance and installation of provenance tests in the face of climate change.	Allgemeine Forst Und Jagdzeitung 189(3-4): 41-56.
Semerci, A., H. Semerci, B. Caliskan, N. Cicek, Y. Ekmekci and M. Mencuccini	2017	Morphological and physiological responses to drought stress of European provenances of Scots pine.	European Journal of Forest Research 136(1): 91-104.
Shryock, D. F., L. A. DeFalco and T. C. Esque	2018	Spatial decision-support tools to guide restoration and seed-sourcing in the Desert Southwest.	Ecosphere 9(10).
Shryock, D. F., C. A. Havrilla, L. A. DeFalco, T. C. Esque, N. A. Custer and T. E. Wood	2017	Landscape genetic approaches to guide native plant restoration in the Mojave Desert.	Ecol Appl 27(2): 429-445.
Shryock, D. F., L. K. Washburn, L. A. DeFalco and T. C. Esque	2021	Harnessing landscape genomics to identify future climate resilient genotypes in a desert annual.	Mol Ecol 30(3): 698-717.
Silva, J. C. E., P. A. Harrison, R. Wiltshire and B. M. Potts	2018	Evidence that divergent selection shapes a developmental cline in a forest tree species complex.	Annals of Botany 122(1): 181-194.
Skalova, H., W. Y. Guo, L. Moravcova and P. Pysek	2019	Performance of Ambrosia artemisiifolia and its potential competitors in an experimental temperature and salinity gradient and implications for management.	Management of Biological Invasions 10(2): 359-376.
Sniderhan, A. E., G. G. McNickle and J. L. Baltzer	2018	Assessing local adaptation vs. plasticity under different resource conditions in seedlings of a dominant boreal tree species.	AoB Plants 10(1): ply004.
Sofletea, N., A. L. Curtu, M. L. Daia and M. Budeanu	2015	The Dynamics and Variability of Radial Growth in Provenance Trials of Norway Spruce (Picea abies (L.) Karst.) Within and Beyond the Hot Margins of its Natural Range.	Notulae Botanicae Horti Agrobotanici Cluj-Napoca 43(1): 265-271.
Solarik, K. A., D. Gravel, A. Ameztegui, Y. Bergeron and C. Messier	2016	Assessing tree germination resilience to global warming: a manipulative experiment using sugar maple (Acer saccharum).	Seed Science Research 26(2): 153-164.
Solarik, K. A., C. Messier, R. Ouimet, Y. Bergeron and D. Gravel	2018	Local adaptation of trees at the range margins impacts range shifts in the face of climate change.	Global Ecology and Biogeography 27(12): 1507-1519.
Sommerville, K., M. Rossetto and A. Pulkownik	2013	Maximising adaptive potential in translocated populations of clonal saltmarsh plants: a case study on Wilsonia backhousei, Convolvulaceae.	Wetlands Ecology and Management 21(5): 339-351.
Soto-Correa, J. C., R. Lindig-Cisneros and C. Saenz-Romero	2014	Lupinus elegans KUNTH ASSISTED MIGRATION IN COMMON GARDEN FIELD TESTS.	Revista Fitotecnia Mexicana 37(2): 107-116.
Soto-Correa, J. C., C. Saenz-Romero, R. Lindig-Cisneros, N. Sanchez-Vargas and J. Cruz-de-Leon	2012	GENETIC VARIATION BETWEEN Lupinus elegans Kunth PROVENANCES, ALTITUDINAL SEED ZONING AND ASSISTED MIGRATION.	Agrociencia 46(6): 593-608.
Soto-Correa, J. C., C. Saenz-Romero, H. Paz and R. Lindig-Cisneros	2015	Drought stress in provenances of Lupinus elegans from different altitudes.	Madera Y Bosques 21(1): 35-43.
St Clair, J. B. and G. T. Howe	2007	Genetic maladaptation of coastal Douglas-fir seedlings to future climates.	Global Change Biology 13(7): 1441-1454.
St Clair, J. B., G. T. Howe and J. G. Kling	2020	The 1912 Douglas-Fir Heredity Study: Long-Term Effects of Climatic Transfer Distance on Growth and Survival.	Journal of Forestry 118(1): 1-13.
St Clair, J. B., F. F. Kilkenny, R. C. Johnson, N. L. Shaw and G. Weaver	2013	Genetic variation in adaptive traits and seed transfer zones for Pseudoroegneria spicata (bluebunch wheatgrass) in the northwestern United States.	Evolutionary Applications 6(6): 933-948.
Ste-Marie, C., E. A. Nelson, A. Dabros and M. E. Bonneau	2011	Assisted migration: Introduction to a multifaceted concept.	Forestry Chronicle 87(6): 724-730.
Stevens, A. V., A. B. Nicotra, R. C. Godfree and L. K. Guja	2020	Polyploidy affects the seed, dormancy and seedling characteristics of a perennial grass, conferring an advantage in stressful climates.	Plant Biol (Stuttg) 22(3): 500-513.
Supple, M. A., J. G. Bragg, L. M. Broadhurst, A. B. Nicotra, M. Byrne, R. L. Andrew, A. Widdup, N. C. Aitken and J. O. Borevitz	2018	Landscape genomic prediction for restoration of a Eucalyptus foundation species under climate change.	Elife 7.
Taibi, K., A. D. del Campo, A. Aguado and J. M. Mulet	2015	The effect of genotype by environment interaction, phenotypic plasticity and adaptation on Pinus halepensis reforestation establishment under expected climate drifts.	Ecological Engineering 84: 218-228.
Taibi, K., A. D. Del Campo, A. Aguado and J. M. Mulet	2016	Early establishment response of different Pinus nigra ssp. salzmanii seed sources on contrasting environments: Implications for future reforestation programs and assisted population migration.	J Environ Manage 171: 184-194.
Taibi, K., A. D. del Campo, J. M. Mulet, J. Flors and A. Aguado	2014	Testing Aleppo pine seed sources response to climate change by using trial sites reflecting future conditions.	New Forests 45(5): 603-624.
Taibi, K., A. D. del Campo, A. Vilagrosa, J. M. Belles, M. P. Lopez-Gresa, D. Pla, J. J. Calvete, J. M. Lopez-Nicolas and J. M. Mulet	2017	Drought Tolerance in Pinus halepensis Seed Sources As Identified by Distinctive Physiological and Molecular Markers.	Frontiers in Plant Science 8.
Tedla, B., Q. L. Dang and S. Inoue	2020	CO(2)Elevation and Photoperiods North of Seed Origin Change Autumn and Spring Phenology as Well as Cold Hardiness in Boreal White Birch.	Frontiers in Plant Science 11.
Tedla, B., Q. L. Dang and S. Inoue	2021	Longer photoperiods negate the CO2 stimulation of photosynthesis in Betula papyrifera Marsh: Implications to climate change-induced migration.	Physiol Plant 172(1): 106-115.
Ter-Mikaelian, M. and C. Bowling	2014	Effect of climatic conditions on height growth of red pine: Results of a provenance test in northwestern Ontario.	Forestry Chronicle 90(6): 794-800.
Thangjam, U., U. K. Sahoo and P. Thong	2020	Characterization of morphometric, reproductive and seedling traits of Parkia timoriana in northeast India.	Silva Fennica 54(1).
Thomas, E., R. Jalonen, J. Loo, D. Boshier, L. Gallo, S. Cavers, S. Bordacs, P. Smith and M. Bozzano	2014	Genetic considerations in ecosystem restoration using native tree species.	Forest Ecology and Management 333: 66-75.
Thomson, A. M., K. A. Crowe and W. H. Parker	2010	Optimal white spruce breeding zones for Ontario under current and future climates.	Canadian Journal of Forest Research-Revue Canadienne De Recherche Forestiere 40(8): 1576-1587.
Thomson, A. M. and W. H. Parker	2008	Boreal forest provenance tests used to predict optimal growth and response to climate change. 1. Jack pine.	Canadian Journal of Forest Research-Revue Canadienne De Recherche Forestiere 38(1): 157-170.
Thomson, A. M., C. L. Riddell and W. H. Parker	2009	Boreal forest provenance tests used to predict optimal growth and response to climate change: 2. Black spruce.	Canadian Journal of Forest Research 39(1): 143-153.
Timpane-Padgham, B. L., T. Beechie and T. Klinger	2017	A systematic review of ecological attributes that confer resilience to climate change in environmental restoration.	Plos One 12(3).
Trakhtenbrot, A., R. Nathan, G. Perry and D. M. Richardson	2005	The importance of long-distance dispersal in biodiversity conservation.	Diversity and Distributions 11(2): 173-181.
Trujillo-Moya, C., J. P. George, S. Fluch, T. Geburek, M. Grabner, S. Karanitsch-Ackerl, H. Konrad, K. Mayer, E. M. Sehr, E. Wischnitzki and S. Schueler	2018	Drought Sensitivity of Norway Spruce at the Species' Warmest Fringe: Quantitative and Molecular Analysis Reveals High Genetic Variation Among and Within Provenances.	G3-Genes Genomes Genetics 8(4): 1225-1245.
Tso, K. L. and G. J. Allan	2019	Environmental variation shapes genetic variation in Bouteloua gracilis: Implications for restoration management of natural populations and cultivated varieties in the southwestern United States.	Ecol Evol 9(1): 482-499.
Tsuyama, I., W. Ishizuka, K. Kitamura, H. Taneda and S. Goto	2020	Ten Years of Provenance Trials and Application of Multivariate Random Forests Predicted the Most Preferable Seed Source for Silviculture of Abies sachalinensis in Hokkaido, Japan.	Forests 11(10).
Ukrainetz, N. K., G. A. O'Neill and B. Jaquish	2011	Comparison of fixed and focal point seed transfer systems for reforestation and assisted migration: a case study for interior spruce in British Columbia.	Canadian Journal of Forest Research 41(7): 1452-1464.
Ulrich, D. E. M., S. Sevanto, S. Peterson, M. Ryan and J. Dunbar	2019	Effects of Soil Microbes on Functional Traits of Loblolly Pine (Pinus taeda) Seedling Families From Contrasting Climates.	Front Plant Sci 10: 1643.
Uribe-Salas, D., C. Saenz-Romero, A. Gonzalez-Rodriguez, O. Tellez-Valdez and K. Oyama	2008	Foliar morphological variation in the white oak Quercus rugosa Nee (Fagaceae) along a latitudinal gradient in Mexico: Potential implications for management and conservation.	Forest Ecology and Management 256(12): 2121-2126.
vanNiejenhuis, A. and W. H. Parker	1996	Adaptive variation in jack pine from north central Ontario determined by short term common garden tests.	Canadian Journal of Forest Research-Revue Canadienne De Recherche Forestiere 26(11): 2006-2014.
Varsamis, G., T. Merou, I. Takos, C. Malesios, A. Manolis and A. C. Papageorgiou	2020	Seed Adaptive Traits of Fagus sylvatica Populations in Northeastern Greece.	Forest Science 66(4): 403-415.
Vasques, A., E. Chirino, A. Vilagrosa, V. R. Vallejo and J. J. Keizer	2013	The role of seed provenance in the early development of Arbutus unedo seedlings under contrasting watering conditions.	Environmental and Experimental Botany 96: 11-19.
Vasques, A., V. R. Vallejo, M. C. Santos and J. J. Keizer	2014	The role of cold storage and seed source in the germination of three Mediterranean shrub species with contrasting dormancy types.	Annals of Forest Science 71(8): 863-872.
Vastag, E., B. Kovacevic, S. Orlovic, L. Kesic, M. Bojovic and S. Stojnic	2019	LEAF STOMATAL TRAITS VARIATION WITHIN AND AMONG FOURTEEN EUROPEAN BEECH (Fagus sylvatica L.) PROVENANCES.	Genetika-Belgrade 51(3): 937-959.
Vidaller, C., T. Dutoit, Y. Ibrahim, H. M. Hanslin and A. Bischoff	2018	Adaptive differentiation among populations of the Mediterranean dry grassland species Brachypodium retusum: The role of soil conditions, grazing, and humidity.	American Journal of Botany 105(7): 1123-1132.
Vihera-Aarnio, A., K. Kostiainen, R. Piispanen, P. Saranpaa and E. Vapaavuori	2013	Effects of seed transfers on yield and stem defects of silver birch (Betula pendula Roth).	Forest Ecology and Management 289: 133-142.
Villeneuven, I., M. S. Lamhamedi, L. Benomar, A. Rainville, J. DeBlois, J. Beaulieu, J. Bousquet, M. C. Lambert and H. Margolis	2016	Morpho-Physiological Variation of White Spruce Seedlings from Various Seed Sources and Implications for Deployment under Climate Change.	Frontiers in Plant Science 7.
Vitt, P., P. N. Belmaric, R. Book and M. Curran	2016	Assisted migration as a climate change adaptation strategy: lessons from restoration and plant reintroductions.	Israel Journal of Plant Sciences 63(4): 250-261.
Vogan, P. J. and A. W. Schoettle	2015	Selection for resistance to white pine blister rust affects the abiotic stress tolerances of limber pine.	Forest Ecology and Management 344: 110-119.
Vyse, A., M. R. Cleary and I. R. Cameron	2013	Tree species selection revisited for plantations in the Interior Cedar Hemlock zone of southern British Columbia.	Forestry Chronicle 89(3): 382-391.
Wang, B. S. P. and E. K. Morgenstern	2009	A strategy for seed management with climate change.	Forestry Chronicle 85(1): 39-42.
Wang, G., C. C. Baskin, J. M. Baskin, X. Yang, G. Liu, X. Ye, X. Zhang and Z. Huang	2018	Effects of climate warming and prolonged snow cover on phenology of the early life history stages of four alpine herbs on the southeastern Tibetan Plateau.	Am J Bot 105(6): 967-976.
Wang, T., A. Hamann, A. Yanchuk, G. A. O'Neill and S. N. Aitken	2006	Use of response functions in selecting lodgepole pine populations for future climates.	Global Change Biology 12(12): 2404-2416.
Wang, T., G. A. O'Neill and S. N. Aitken	2010	Integrating environmental and genetic effects to predict responses of tree populations to climate.	Ecol Appl 20(1): 153-163.
Wang, Y. Z., J. L. M. Pedersen, S. E. Macdonald, S. E. Nielsen and J. Zhang	2019	Experimental test of assisted migration for conservation of locally range-restricted plants in Alberta, Canada.	Global Ecology and Conservation 17.
Waterton, J., S. J. Mazer, J. R. Meyer and E. E. Cleland	2021	Trade-off drives Pareto optimality of within- and among-year emergence timing in response to increasing aridity.	Evolutionary Applications 14(3): 658-673.
Weeks, A. R., C. M. Sgro, A. G. Young, R. Frankham, N. J. Mitchell, K. A. Miller, M. Byrne, D. J. Coates, M. D. Eldridge, P. Sunnucks, M. F. Breed, E. A. James and A. A. Hoffmann	2011	Assessing the benefits and risks of translocations in changing environments: a genetic perspective.	Evol Appl 4(6): 709-725.
Wendelberger, K. S. and J. Maschinski	2016	Assessing microsite and regeneration niche preferences through experimental reintroduction of the rare plant Tephrosia angustissima var. corallicola.	Plant Ecology 217(2): 155-167.
Wesolowski, A., C. J. Blackman, R. A. Smith, D. T. Tissue and S. Pfautsch	2020	Elevated CO2 Did Not Stimulate Stem Growth in 11 Provenances of a Globally Important Hardwood Plantation Species.	Frontiers in Forests and Global Change 3.
Whalley, R. D. B., I. H. Chivers and C. M. Waters	2013	Revegetation with Australian native grasses - a reassessment of the importance of using local provenances.	Rangeland Journal 35(2): 155-166.
Wheeler, N. C., K. C. Steiner, S. E. Schlarbaum and D. B. Neale	2015	The Evolution of Forest Genetics and Tree Improvement Research in the United States.	Journal of Forestry 113(5): 500-510.
Wilczek, A. M., M. D. Cooper, T. M. Korves and J. Schmitt	2014	Lagging adaptation to warming climate in Arabidopsis thaliana.	Proc Natl Acad Sci U S A 111(22): 7906-7913.
Williams, M. I. and R. K. Dumroese	2013	Preparing for Climate Change: Forestry and Assisted Migration.	Journal of Forestry 111(4): 287-297.
Williamson, T. B., M. H. Johnstone, H. W. Nelson and J. E. Edwards	2019	Adapting to climate change in Canadian forest management: Past, present and future.	Forestry Chronicle 95(2): 76-90.
Wilson, L. R., D. J. Gibson, S. G. Baer and L. C. Johnson	2016	Plant community response to regional sources of dominant grasses in grasslands restored across a longitudinal gradient.	Ecosphere 7(4).
Wolf, A., N. B. Zimmerman, W. R. L. Anderegg, P. E. Busby and J. Christensen	2016	Altitudinal shifts of the native and introduced flora of California in the context of 20th-century warming.	Global Ecology and Biogeography 25(4): 418-429.
Wright, J. W., K. F. Davies, J. A. Lau, A. C. McCall and J. K. McKay	2006	Experimental verification of ecological niche modeling in a heterogeneous environment.	Ecology 87(10): 2433-2439.
Yang, J., J. H. Pedlar, D. W. McKenney and A. Weersink	2015	The development of universal response functions to facilitate climate-smart regeneration of black spruce and white pine in Ontario, Canada.	Forest Ecology and Management 339: 34-43.
Ying, C. C. and A. D. Yanchuk	2006	The development of British Columbia's tree seed transfer guidelines: Purpose, concept, methodology, and implementation.	Forest Ecology and Management 227(1-2): 1-13.
Yoko, Z. G., K. L. Volk, N. A. Dochtermann and J. A. Hamilton	2020	The importance of quantitative trait differentiation in restoration: landscape heterogeneity and functional traits inform seed transfer guidelines.	AoB Plants 12(2): plaa009.
Young, D. J. N., T. D. Blush, M. Landram, J. W. Wright, A. M. Latimer and H. D. Safford	2020	Assisted gene flow in the context of large-scale forest management in California, USA.	Ecosphere 11(1).
Young, K. R. and S. Duchicela	2020	Abandoning Holocene Dreams: Proactive Biodiversity Conservation in a Changing World.	Annals of the American Association of Geographers 111(3): 880-888.
Zhang, Z., G. Jin, Z. Feng, L. Sun, Z. Zhou, Y. Zheng and C. Yuan	2020	Joint influence of genetic origin and climate on the growth of Masson pine (Pinus massoniana Lamb.) in China.	Sci Rep 10(1): 4653.
Zhu, H. Y., Y. H. Weng, H. G. Zhang, F. R. Meng and J. E. Major	2013	Comparing fast- and slow-growing provenances of Picea koraiensis in biomass, carbon parameters and their relationships with growth.	Forest Ecology and Management 307: 178-185.

## Sheet: Sheet1
		Picea abies L. Karst.) on German and Hungarian test sites.
		Santalum album Linn., Santalaceae) to climate changes.
